# Supplementary material
Source: Research Square preprint supplement (doi:10.21203/rs.3.rs-8489046/v1)
Supplement: Supplementary file 1 [file 1a9fc4a1aa0441957289fbca.docx]

**Table S1.** Background and post-exposure metal concentrations (mg/kg)

|  | **Cr** | **Zn** | **Pb** | **Cu** | **As** |
| --- | --- | --- | --- | --- | --- |
| **Autumn** | | | | | |
| K (background) | 18.694 | 26.870 | 5.20 | 6.468 | 15.000 |
| S1(Industrial Estate) | 56.637 | 137.647 | 6.324 | 13.490 | 35.912 |
| S2 (Airport Junction) | 85.010 | 1625.000 | 9.971 | 20.423 | 56.154 |
| S3 (Pier square) | 48.527 | 73.216 | 6.065 | 10.520 | 92.637 |
| S4 (Public bazaar) | 47.440 | 808.300 | 10.170 | 14.740 | 33.140 |
| **Winter** | | | | | |
| K (background) | 14.11 | 39.501 | 6.17 | 4.134 | 19.315 |
| S1(Industrial Estate) | 70.880 | 71.150 | 2.207 | 8.842 | 62.000 |
| S2 (Airport Junction) | 9.288 | 2.398 | 9.279 | 6.636 | 53.100 |
| S3 (Pier square) | 45.520 | 15.210 | 3.671 | 6.688 | 47.245 |
| S4 (Public bazaar) | 12.170 | 143.942 | 3.810 | 6.378 | 16.570 |

| **Spring** | | | | | |
| --- | --- | --- | --- | --- | --- |
| K (background) | 6.255 | 67.203 | 1.222 | 3.612 | 21.152 |
| S1(Industrial Estate) | 9.557 | 104.400 | 7.485 | 9.308 | 32.500 |
| S2 (Airport Junction) | 9.557 | 99.960 | 8.440 | 15.680 | 30.500 |
| S3 (Pier square) | 3.490 | 98.180 | 8.000 | 14.400 | 30.750 |
| S4 (Public bazaar) | 5.899 | 206.800 | 7.750 | 13.250 | 16.750 |

| **Summer** | | | | | |
| --- | --- | --- | --- | --- | --- |
| K (background) | 7.565 | 87.524 | 1.174 | 8.208 | 25.511 |
| S1(Industrial Estate) | 12.316 | 97.575 | 2.658 | 9.905 | 28.057 |
| S2 (Airport Junction) | 12.013 | 56.025 | 4.334 | 8.940 | 25.006 |
| S3 (Pier square) | 11.930 | 57.275 | 5.370 | 12.720 | 21.413 |
| S4 (Public bazaar) | 11.030 | 291.001 | 4.098 | 9.785 | 20.910 |
