# Supplementary material
Source: Research Square preprint supplement (doi:10.21203/rs.3.rs-8489046/v1)
Supplement: Supplementary file 2 [file 64dee36132521473ac58d128.docx]

**TABLE FILE**

**Table 1.** Geographical coordinates and environmental characteristics of monitoring sites

| **Code** | **Monitoring site** | **Coordinates (DMS)** | **Station location** |
| --- | --- | --- | --- |
| S1 | Small Industrial Estate | 40°08'32"N, 26°24'38"E | Area with industrial sites and an urban road network |
| S2 | Airport Junction | 40°08'16"N, 26°25'16"E | Area with an airport and associated transport infrastructure |
| S3 | Pier square | 40°08'59"N, 26°24'09"E | Area where the coastal zone intersects with the urban road network |
| S4 | Public bazaar | 40°08'38"N, 26°24'27"E | Road traffic and urban activity area |

**Table 2.** Metal concentrations in seasonal background samples(mg/kg)

|  | **Cr** | **Zn** | **Pb** | **Cu** | **As** |
| --- | --- | --- | --- | --- | --- |
| **Autumn** | 18.69 | 26.87 | 5.20 | 6.46 | 15.00 |
| **Winter** | 14.11 | 39.50 | 6.17 | 4.13 | 19.31 |
| **Spring** | 6.25 | 67.20 | 1.22 | 3.61 | 21.15 |
| **Summer** | 7.56 | 87.52 | 1.17 | 8.20 | 25.51 |

**Table 3.** Metal concentrations in seasonal exposed moss samples(mg/kg)

|  | **Autumn** | | | **Winter** | | | **Spring** | | | | **Summer** | | |
| --- | --- | --- | --- | --- | --- | --- | --- | --- | --- | --- | --- | --- | --- |
|  | **min** | **max** | **mean** | **min** | **max** | **mean** | **min** | **max** | **mean** | **min** | | **max** | **mean** |
| **Cr** | 47.4 | 85.0 | 59.40 | 9.28 | 70.88 | 34.46 | 3.49 | 9.55 | 7.12 | 11.03 | | 12.31 | 11.57 |
| **Zn** | 73.21 | 1625.0 | 661.0 | 2.39 | 143.9 | 58.17 | 98.18 | 206.8 | 127.3 | 56.02 | | 291.0 | 125.4 |
| **Pb** | 6.32 | 9.97 | 8.13 | 2.20 | 9.27 | 4.73 | 7.48 | 8.44 | 7.91 | 2.65 | | 5.37 | 4.11 |
| **Cu** | 10.17 | 20.42 | 14.79 | 6.37 | 8.84 | 7.13 | 9.30 | 15.68 | 13.15 | 8.94 | | 12.7 | 10.34 |
| **As** | 33.14 | 92.63 | 54.46 | 47.24 | 62.0 | 44.72 | 16.75 | 32.50 | 27.62 | 20.91 | | 28.05 | 23.84 |

**Table 4.** Distribution of Seasonal CF Values (with Colour-Coded Classification)

|  | **As** | **Cr** | **Cu** | **Zn** | **Pb** |
| --- | --- | --- | --- | --- | --- |
| **Autumn** | | | | | |
| S1(Industrial Estate) | 2.39 | 3.02 | 2.08 | 5.12 | 1.21 |
| S2 (Airport Junction) | 3.74 | 4.54 | 2.08 | 60.47 | 1.91 |
| S3 (Pier square) | 6.17 | 2.59 | 1.62 | 2.72 | 1.16 |
| S4 (Public bazaar) | 2.20 | 2.53 | 2.27 | 30.08 | 1.95 |
| **Mean** | **3.62** | **3.17** | **2.01** | **24.59** | **1.55** |
| **Winter** | | | | | |
| S1(Industrial Estate) | 3.20 | 5.02 | 2.13 | 1.80 | 0.35 |
| S2 (Airport Junction) | 2.74 | 0.65 | 1.60 | 0.06 | 1.50 |
| S3 (Pier square) | 2.44 | 3.22 | 1.61 | 0.38 | 0.59 |
| S4 (Public bazaar) | 0.85 | 0.86 | 1.54 | 3.64 | 0.61 |
| **Mean** | **2.30** | **2.43** | **1.72** | **1.47** | **0.76** |
| **Spring** | | | | | |
| S1(Industrial Estate) | 1.53 | 1.52 | 2.57 | 1.55 | 6.12 |
| S2 (Airport Junction) | 1.44 | 1.52 | 4.34 | 1.48 | 6.90 |
| S3 (Pier square) | 1.45 | 0.55 | 3.98 | 1.46 | 6.54 |
| S4 (Public bazaar) | 0.79 | 0.94 | 3.66 | 3.07 | 6.34 |
| **Mean** | **1.30** | **1.13** | **3.63** | **1.89** | **6.47** |
| **Summer** | | | | | |
| S1(Industrial Estate) | 1.09 | 1.62 | 1.20 | 1.11 | 2.36 |
| S2 (Airport Junction) | 0.98 | 1.58 | 1.08 | 0.64 | 3.69 |
| S3 (Pier square) | 0.83 | 1.57 | 1.54 | 0.65 | 4.57 |
| S4 (Public bazaar) | 0.81 | 1.45 | 1.19 | 3.32 | 3.49 |
| **Mean** | **0.92** | **1.55** | **1.25** | **1.42** | **3.52** |

|  | Low contamination (CF<1) |  | Considerable contamination (3≤ CF <6) |
| --- | --- | --- | --- |
|  | Moderate contamination (1≤ CF <3) |  | Very high contamination (CF >6) |

**Table 5.** Seasonal PLI values

| **Station** | **Season** | | | |
| --- | --- | --- | --- | --- |
| S1(Industrial Estate) | **Autmn** | **Winter** | **Spring** | **Summer** |
| 2,23 | 1.84 | 2,248 | 1,379 |
| S2 (Airport Junction) | 3,83 | 0.76 | 2,502 | 1,319 |
| S3 (Pier square) | 2,26 | 1.04 | 1,985 | 1,454 |
| S4 (Public bazaar) | 3,19 | 1.21 | 2,216 | 1,717 |

**Table 6.** Spearman Correlation coefficients (r) between potential toxic elements

| **Variable Pair** | **Correlation Coefficient (r)** | **p-value** |
| --- | --- | --- |
| Cr – Pb | –0.570 | 0.021* |
| Cr – As | 0.724 | 0.002** |
| Pb – Cu | 0.597 | 0.015* |

n = 16 (season × station set); p < 0.05 is considered significant.
